# Supplementary material for: Fragile X mental retardation protein regulates trans-synaptic signaling in Drosophila
Source: PubMed Central journal article supplement (PMC3820263; doi:10.1242/dmm.012229), 2013-09-05
Supplement: supp_012229_DMM012229.pdf [file supp_012229_DMM012229.pdf]

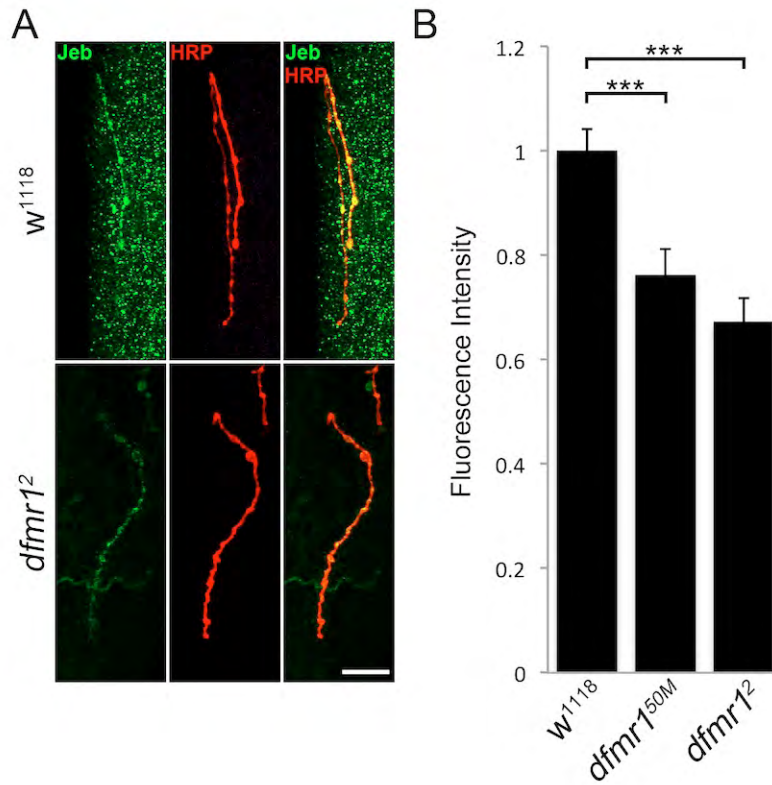

**Supplementary material Fig. S1.** Reduced Jeb levels in the *dfmr1* null muscle. (A) Representative NMJ images co-labeled with presynaptic marker (HRP, red) and anti-Jelly Belly (Jeb, green) in control (*w<sup>1118</sup>*) and *dfmr1* null (*dfmr1<sup>50M</sup>*) wandering third instar muscle 4. Scale bar: 15 $\mu$ m. (B) Quantification of Jeb muscle surface intensity away from the NMJ domain in two *dfmr1* null alleles (*dfmr1<sup>50M</sup>*, *dfmr1<sup>2</sup>*) normalized to the genetic control (*w<sup>1118</sup>*). Sample sizes are  $\geq 9$  animals and  $\geq 18$  muscles for each of the three genotypes. Statistical significance shown as  $***P < 0.001$ .

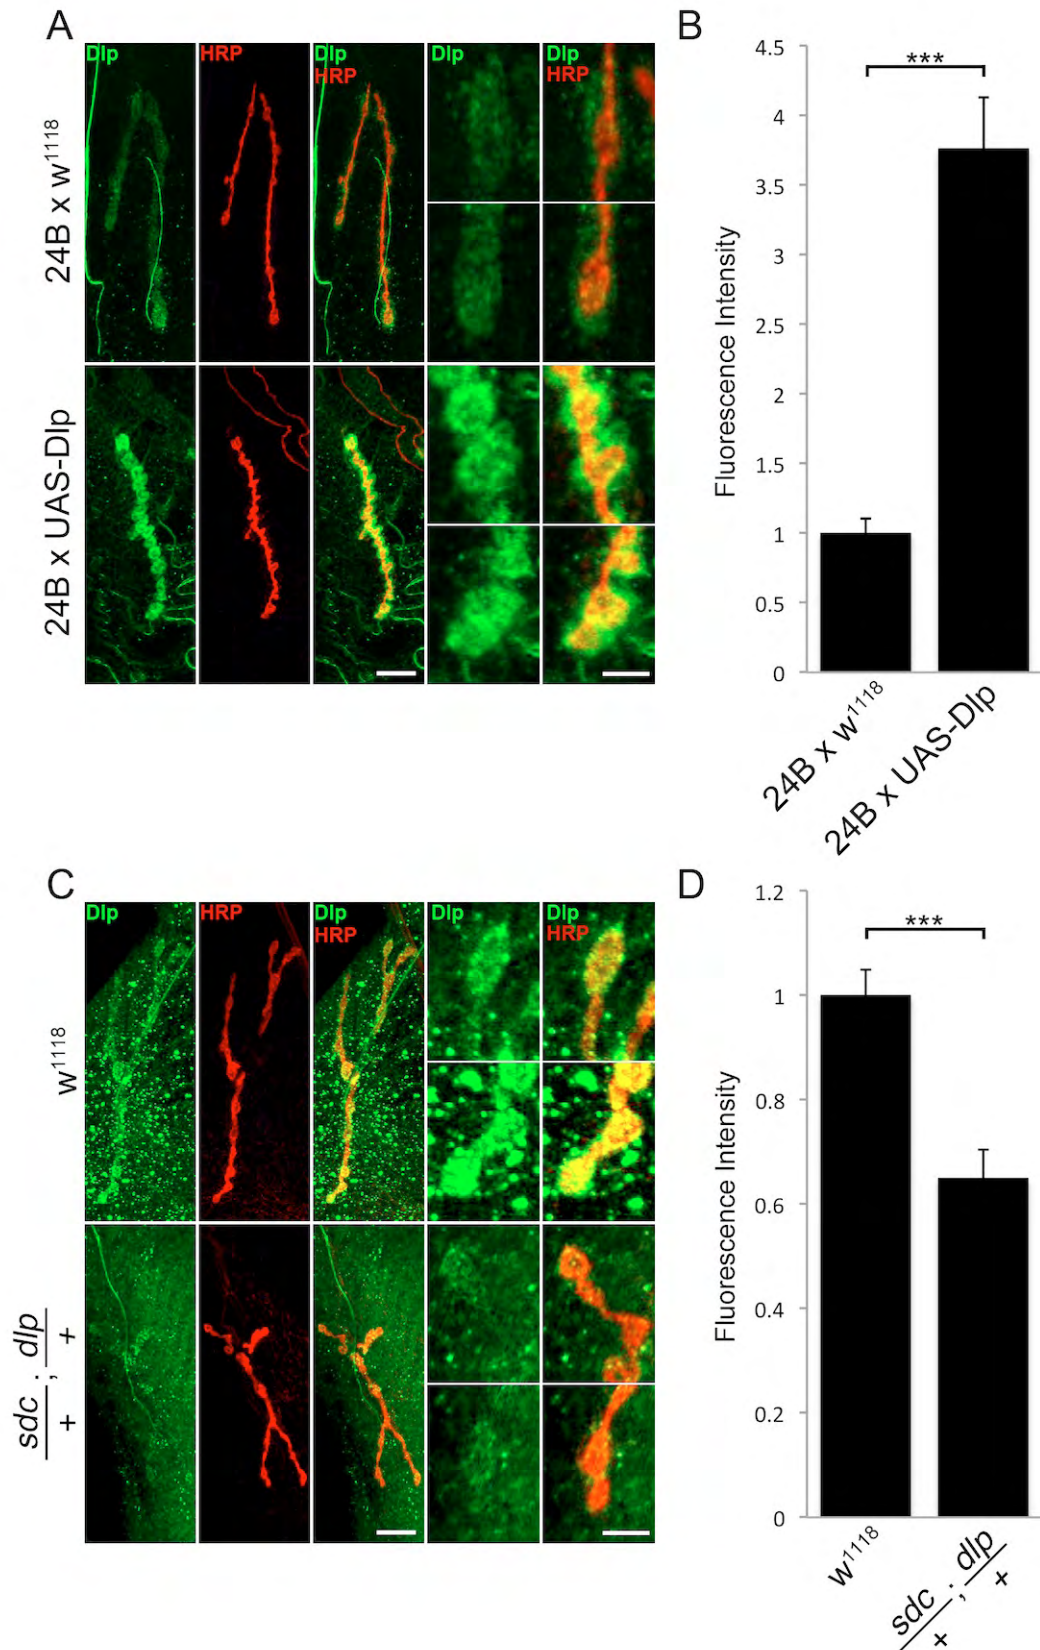

**Supplementary material Fig. S2.** Quantification of Dlp levels with genetic manipulations. (A) Representative NMJ images co-labeled with presynaptic marker anti-horseradish peroxidase (HRP, red) and anti-Dally-like Protein (Dlp, green) in control ( $w^{1118}$ ) and postsynaptic Dlp overexpression ( $24B \times UAS-Dlp$ ) conditions. Scale bars: 15 $\mu$ m and 5  $\mu$ m. (B) Quantification of Dlp intensity normalized to genetic control ( $w^{1118}$ ). Sample size is  $\geq 3$  animals and  $\geq 6$  NMJs for each genotype. (C) Representative NMJ images in control and double heterozygous  $dlp^{A187/+}; sdc^{23/+}$  conditions. Scale bars: 15 $\mu$ m and 5  $\mu$ m. (D) Quantification of Dlp intensity normalized to genetic control ( $w^{1118}$ ). Sample size is  $\geq 8$  animals and  $\geq 16$  NMJs for each genotype. Statistical significance shown as \*\*\* $P < 0.001$ .

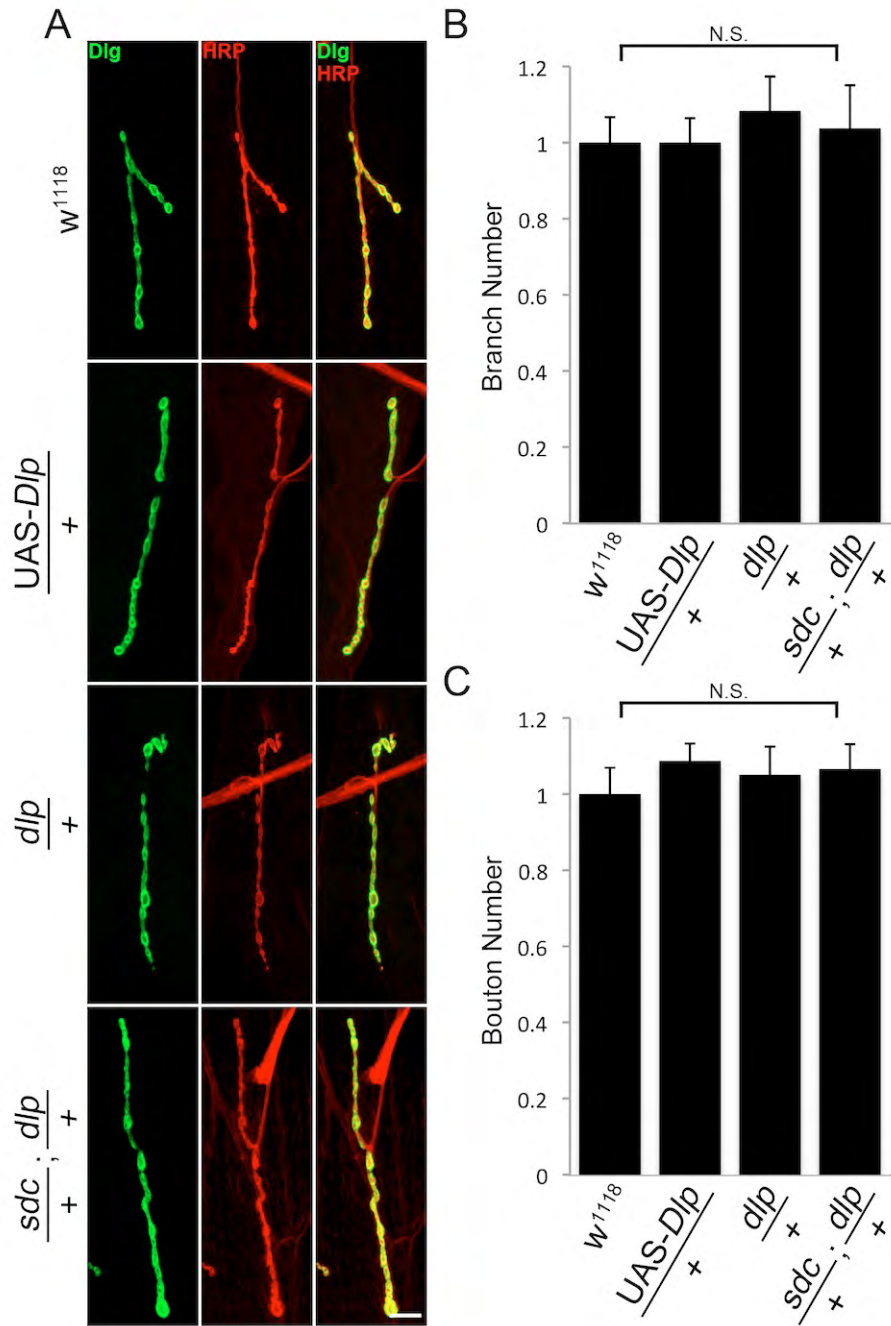

**Supplementary material Fig. S3.** Genetic controls for NMJ synaptic architecture studies. (A) Representative muscle 4 NMJ images co-labeled with presynaptic marker anti-horseradish peroxidase (HRP, red) and postsynaptic marker anti-Discs Large (DLG, green) in control ( $w^{1118}$ ),  $w^{1118}$  crossed to UAS-Dlp, heterozygous  $dlp^{A187/+}$ , and double heterozygous  $dlp^{A187/+}; sdc^{23/+}$ . Scale bar: 15 $\mu$ m. Quantification of NMJ branch (B) and type 1 bouton (C) numbers. Sample size is  $\geq 6$  animals and  $\geq 12$  NMJs for each genotype. Statistical significance shown as N.S. ( $P > 0.05$ ).

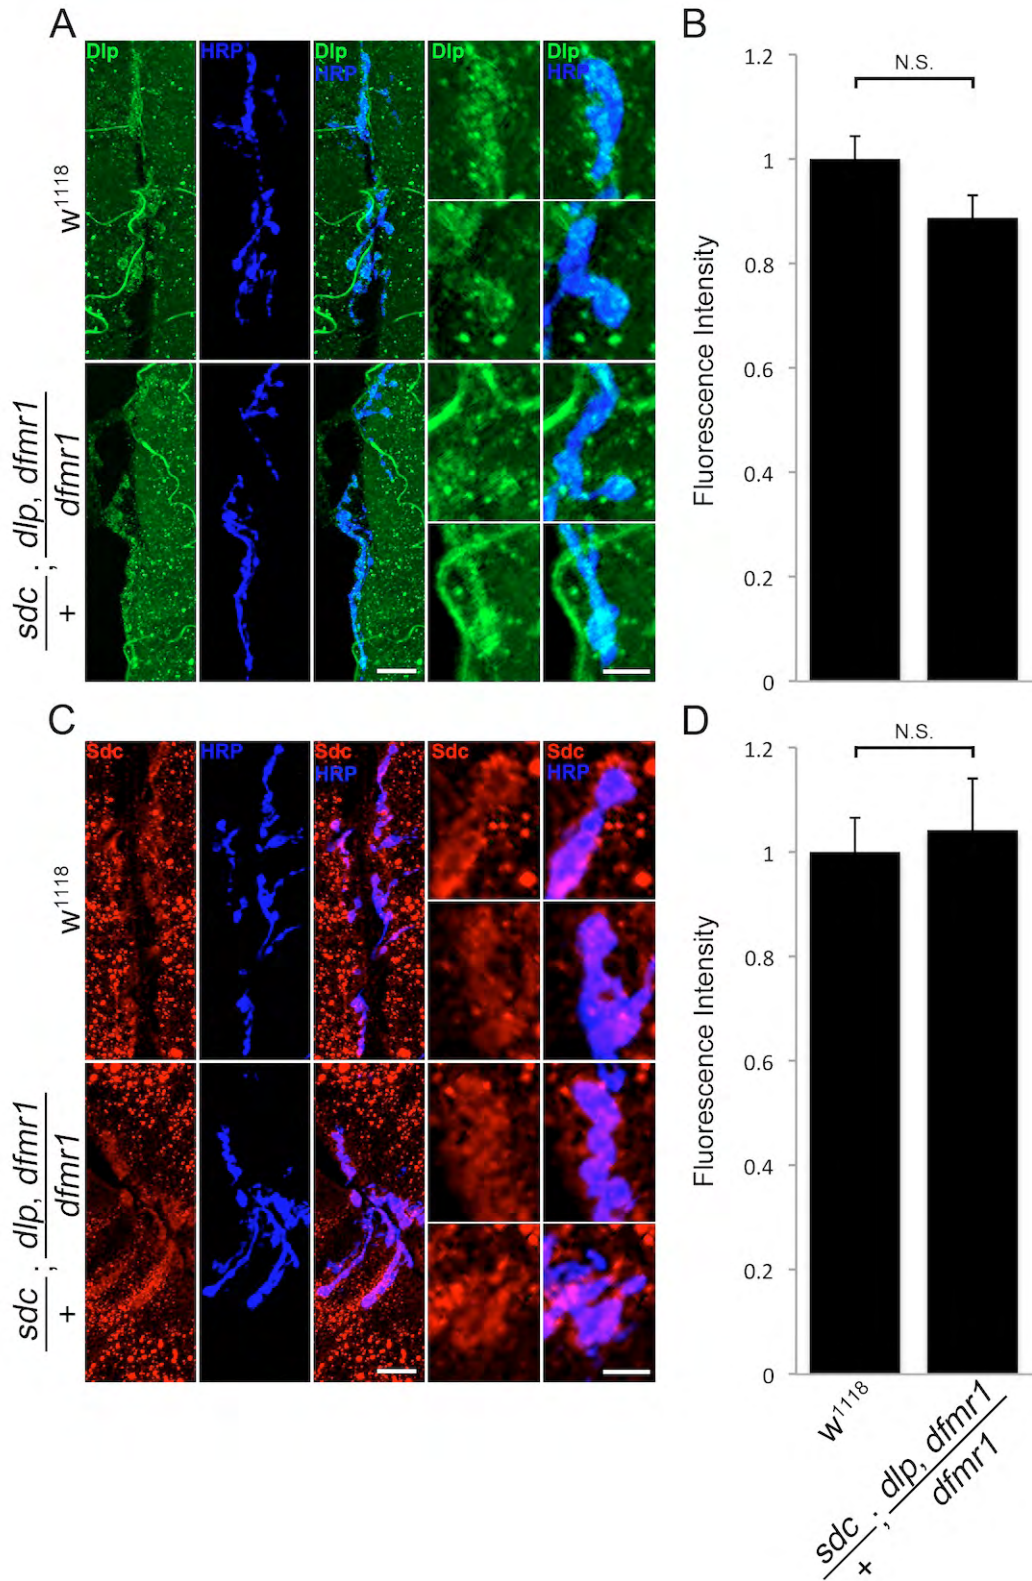

**Supplementary material Fig. S4.** Synaptic HSPG levels in the triple mutant condition. (A) Representative NMJ images co-labeled with anti-HRP (red) and anti-Dlp (green) in genetic control ( $w^{1118}$ ) and  $sdc^{23/+}; dlp^{A187}; dfmr1^{50M}/dfmr1^{50M}$  triple mutant condition. Scale bars: 25 $\mu$ m and 5 $\mu$ m. (B) Quantification of Dlp intensity normalized to control. Sample size is  $\geq 8$  animals and  $\geq 16$  NMJs for genotype. (C) Representative NMJ images co-labeled with anti-HRP (red) and anti-Syndecan (Sdc, green) in control and triple mutant. Scale bars: 25 $\mu$ m and 5 $\mu$ m. (D) Quantification of Sdc intensity normalized to control. Sample sizes are  $\geq 8$  animals and  $\geq 16$  NMJs for each genotype. Statistical significance shown as N.S. ( $P > 0.05$ ).

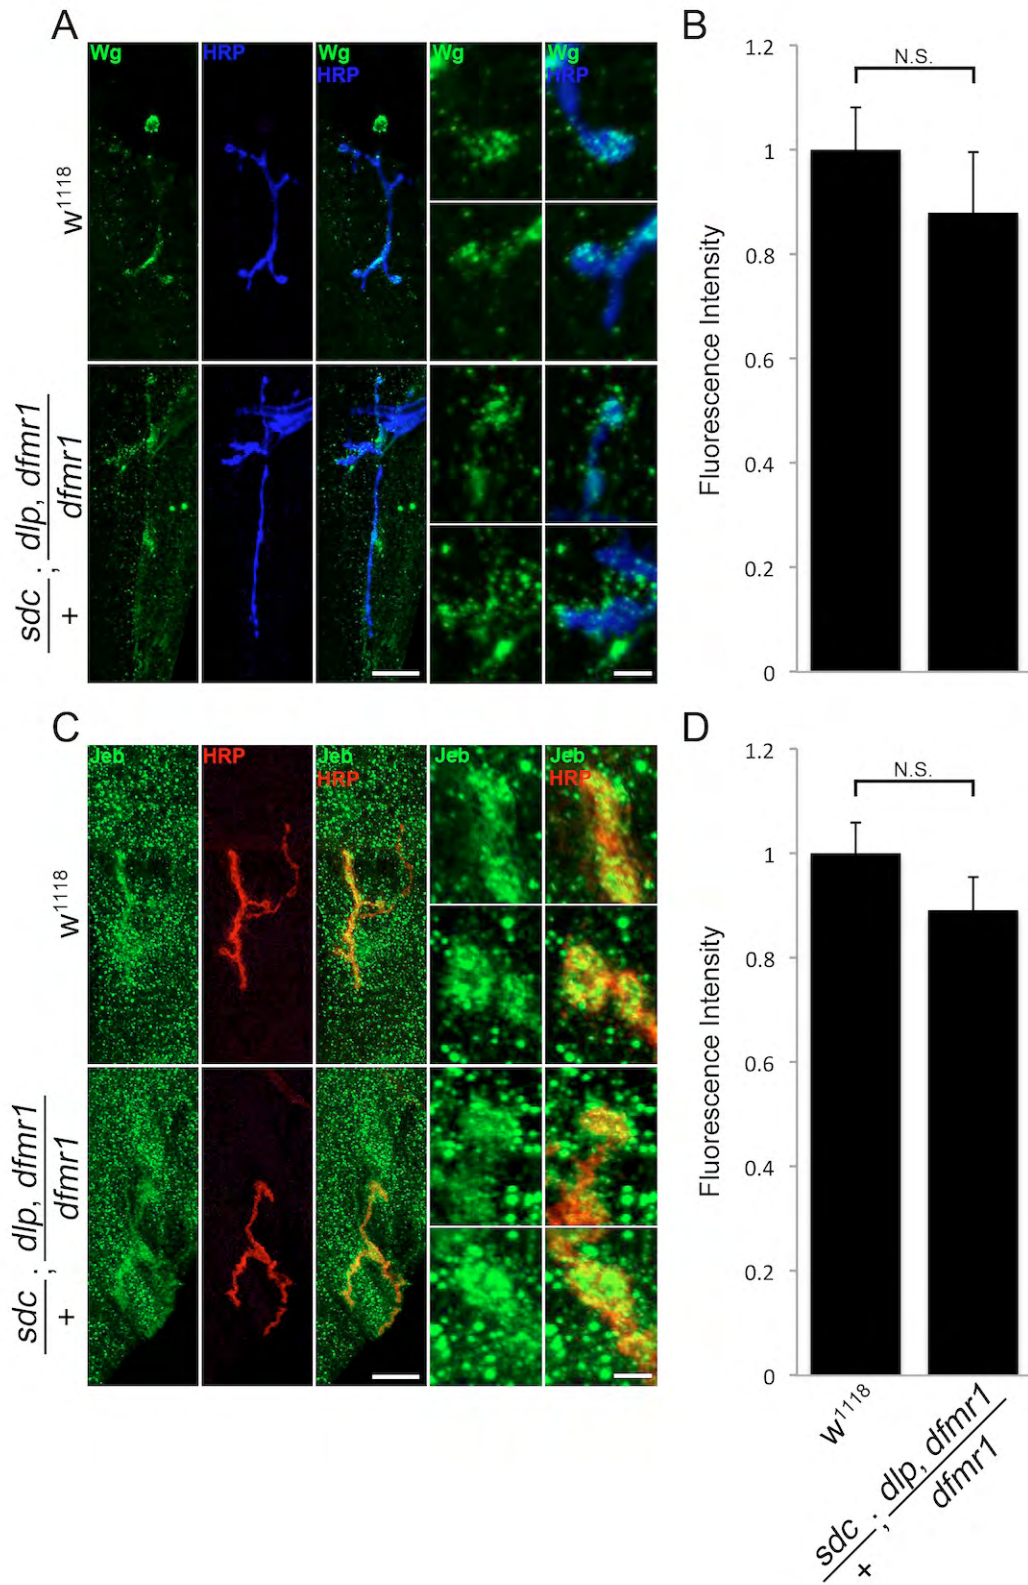

**Supplementary material Fig. S5.** Wg and Jeb ligand levels in the triple mutant condition. (A) Representative NMJ images co-labeled with anti-HRP (red) and anti-Wingless (Wg, green) in control ( $w^{1118}$ ) and  $sdc^{23/+}; dlp^{A187}; dfmr1^{50M/dfmr1}$  triple mutant conditions. Scale bars: 15 $\mu$ m and 5  $\mu$ m. (B) Quantification of Wg intensity normalized to control. Sample size is  $\geq 8$  animals and  $\geq 15$  NMJs for each genotype. (C) Representative NMJ images co-labeled with anti-HRP (red) and anti-Jelly Belly (Jeb, green) in  $w^{1118}$  and triple mutant conditions. Scale bars: 15 $\mu$ m and 5 $\mu$ m. (D) Quantification of Jeb intensity normalized to control. Sample sizes are  $\geq 8$  animals and  $\geq 16$  NMJs for each genotype. Statistical significance shown as N.S. ( $P > 0.05$ ).

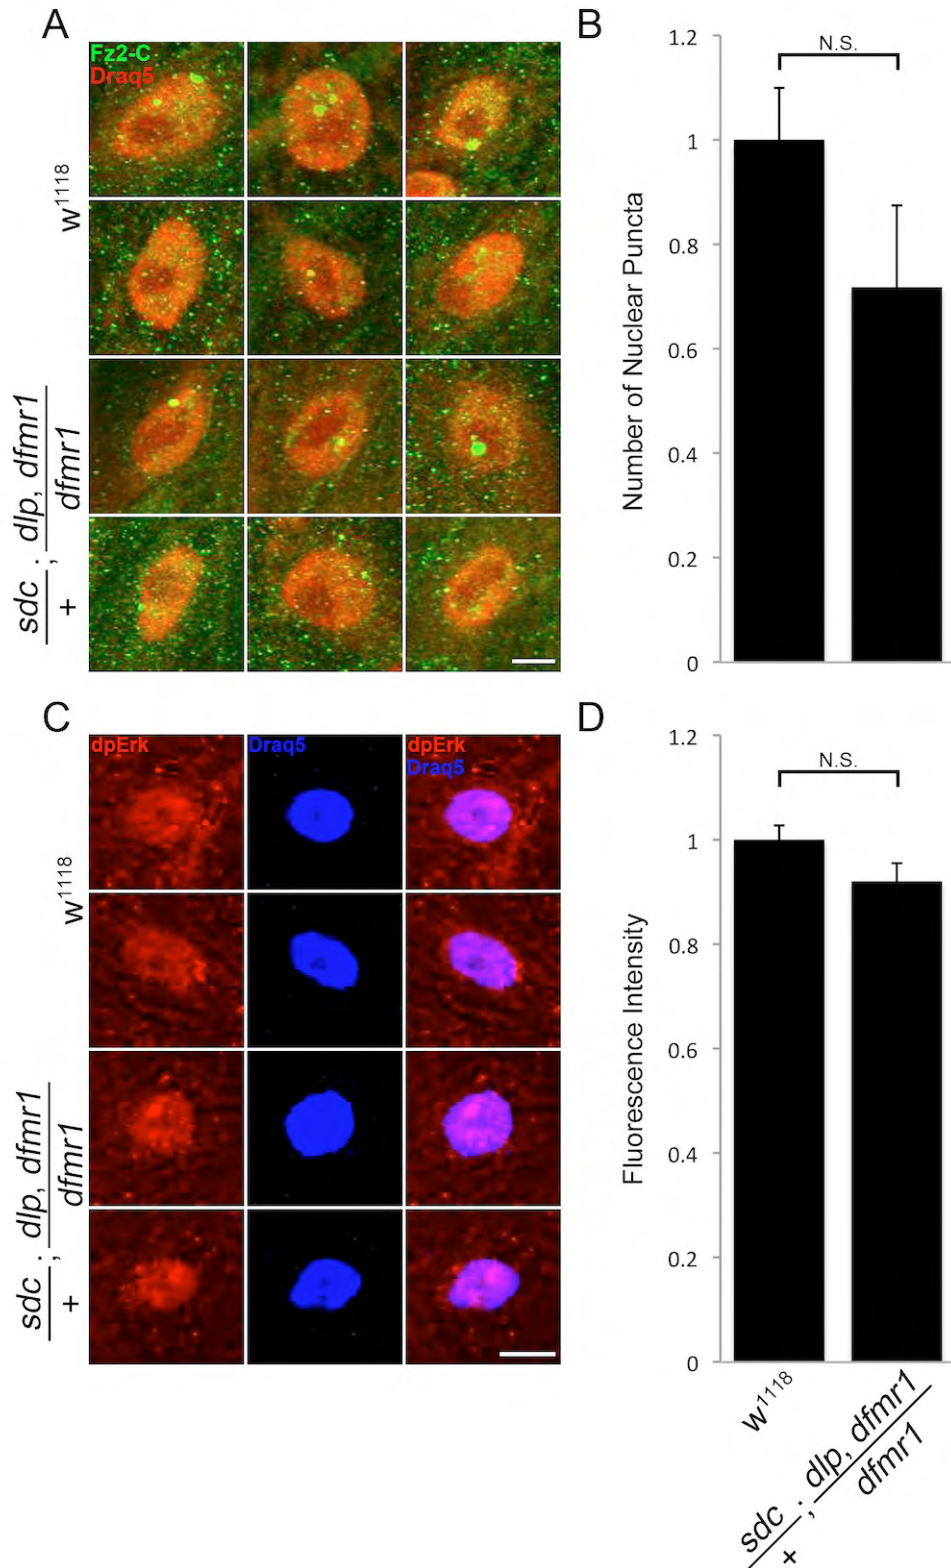

**Supplementary material Fig. S6.** Fz2C- and dpERK nuclear localization in the triple mutant condition. (A) Representative images of wandering third instar muscle 4 nuclei co-labeled with nuclear marker Draq5 (red) and anti-Frizzled C-terminus (Fz2-C, green) in control (*w<sup>1118</sup>*) and *sdc<sup>23/+</sup>; dlp<sup>A187</sup>; dfmr1<sup>50M/50M</sup>* triple mutant conditions. Scale bar: 5 $\mu$ m. (B) Quantification of Fz2-C nuclear localization, measured as Fz2-C puncta number, normalized to genetic control. Sample sizes are  $\geq 3$  animals and  $\geq 6$  muscles for each genotype. (C) Representative images of muscle nuclei co-labeled with nuclear marker Draq5 (red) and anti-diphosphorylated extracellular signal regulated kinase (dpERK, green) in control and triple mutant. Scale bar: 5 $\mu$ m. (D). Quantification of dpERK nuclear intensity levels normalized to genetic control. Sample sizes are  $\geq 8$  animals and  $\geq 15$  muscles for each genotype. Statistical significance shown as N.S. ( $P > 0.05$ ).
